# Supplementary material
Source: PubMed Central journal article supplement (PMC4336065)
Supplement: supp_WNL.0000000000001205_Figure_e-1.pdf [file supp_WNL.0000000000001205_Figure_e-1.pdf]

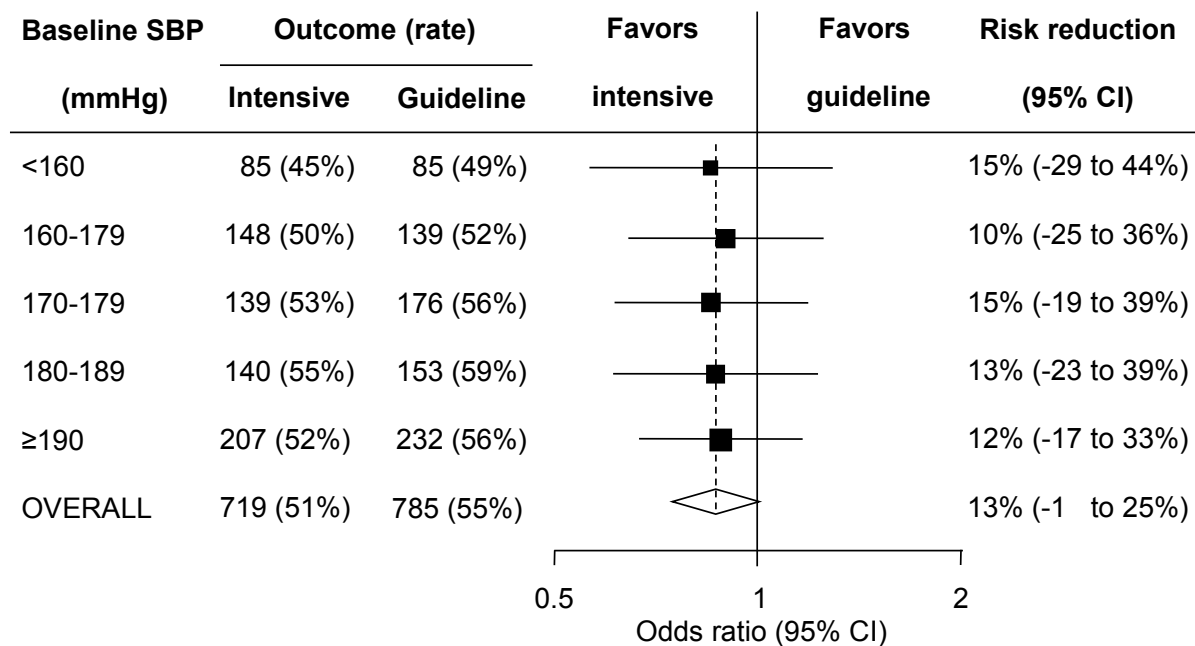

**Figure e-1. Effects of randomized treatment on death or major disability by baseline systolic blood pressure**

The ‘P value for homogeneity’, which tested the consistency of the treatment effects among subgroups, was 0.934. SBP indicates systolic blood pressure; 95% CI, 95% confidence interval. Solid boxes represent estimates of treatment effect on the risk of outcomes. Centers of the boxes are placed at the estimates of the effect; areas of the boxers are proportional to the reciprocal of the variance of the estimates. Horizontal lines represent 95% CIs.

Diamonds represent estimates and 95% CI for overall effects in total subjects.
