# Supplementary material
Source: PubMed Central journal article supplement (PMC4336065)
Supplement: supp_WNL.0000000000001205_Figure_e-2.pdf [file supp_WNL.0000000000001205_Figure_e-2.pdf]

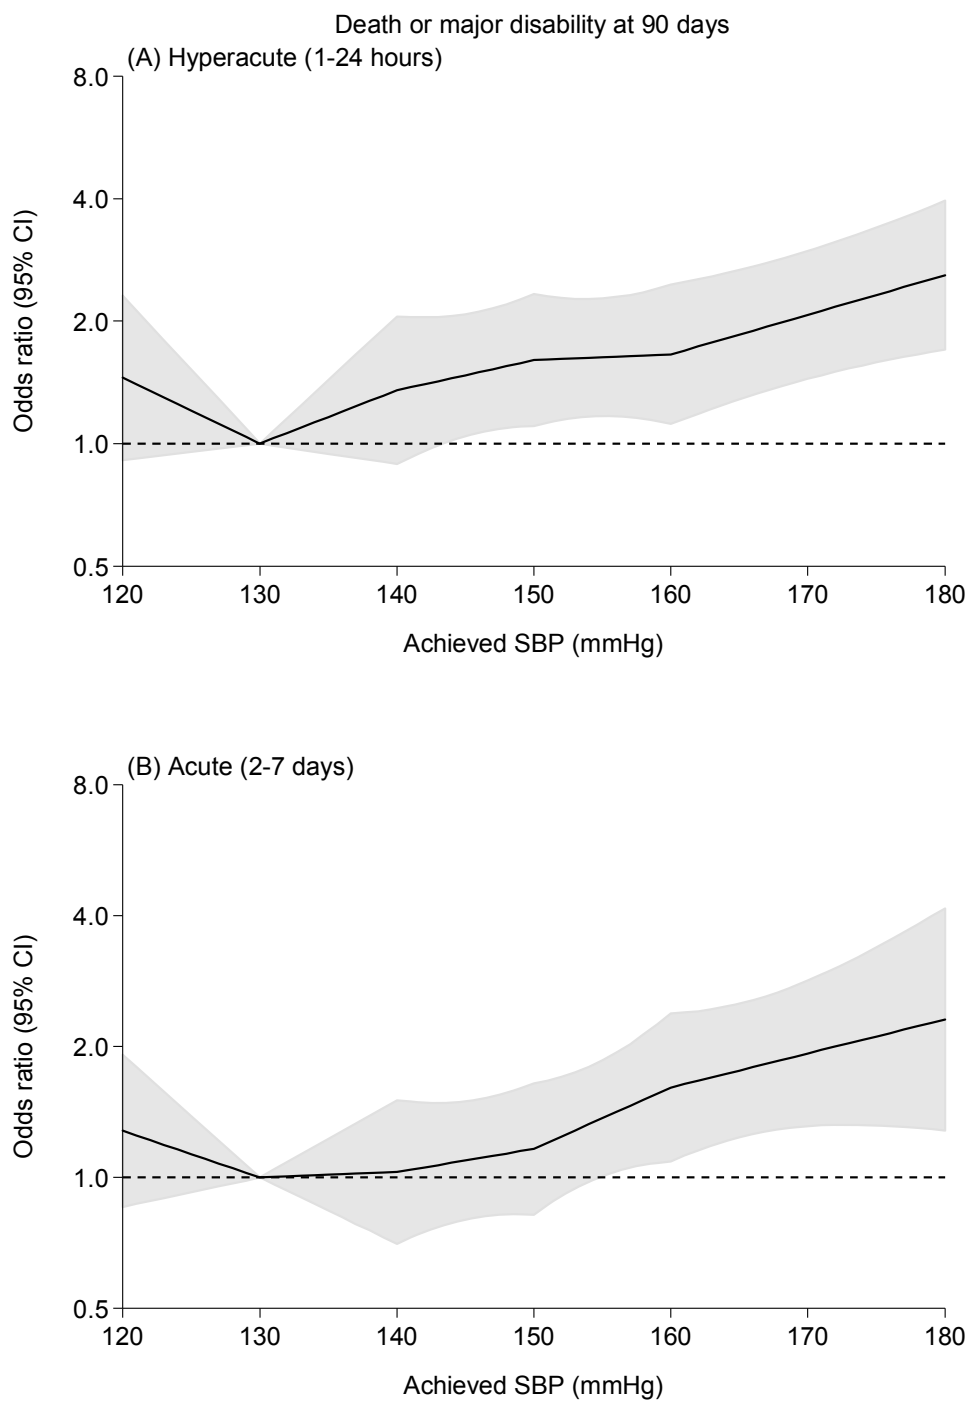

**Figure e-2. Effects of achieved systolic blood pressure (A: 1-24 hours, B: 2-7 days) on death or major disability**

SBP indicates systolic blood pressure; 95% CI, 95% confidence interval. Odds ratios and 95% CIs (shaded areas) were shown according to achieved post-randomization systolic blood pressure after adjustment for age, sex, region, time from onset to randomization, National Institutes of Health Stroke Scale (NIHSS) score, volume and location of hematoma, intraventricular extension and randomized treatment. The reference was achieved post-randomization systolic blood pressure of 130 mmHg.
