# Supplementary material
Source: PubMed Central journal article supplement (PMC4336065)
Supplement: supp_WNL.0000000000001205_Figure_e-4.pdf [file supp_WNL.0000000000001205_Figure_e-4.pdf]

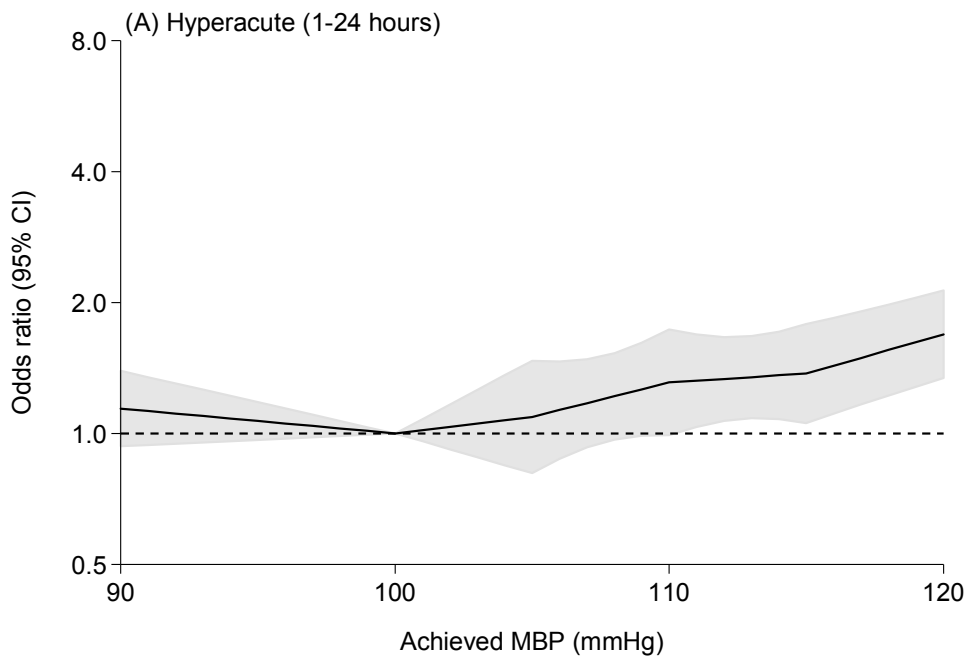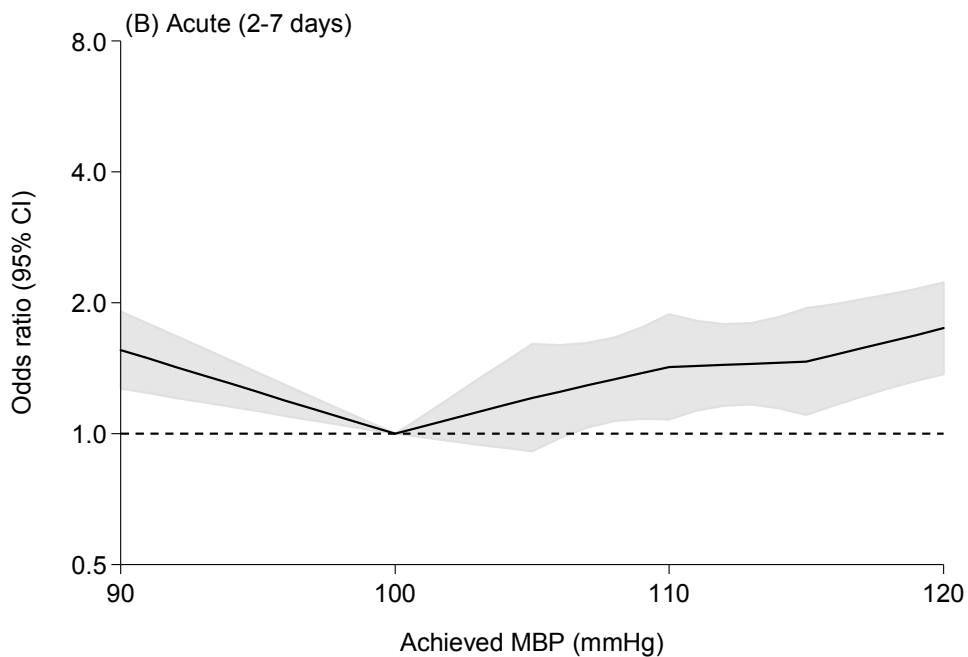

**Figure e-4. Effects of achieved mean blood pressure (A: 1-24 hours, B: 2-7 days) on score of the modified Rankin Scale at 90 days**

MBP indicates mean blood pressure; 95% CI, 95% confidence interval. Odds ratios and 95% CIs (shaded areas) were shown according to achieved post-randomization mean blood pressure after adjustment for age, sex, region, time from onset to randomization, National Institutes of Health Stroke Scale (NIHSS) score, volume and location of hematoma, intraventricular extension and randomized treatment. The reference was achieved post-randomization mean blood pressure of 100 mmHg.
