# Supplementary material
Source: PubMed Central journal article supplement (PMC4336065)
Supplement: supp_WNL.0000000000001205_Figure_e-6.pdf [file supp_WNL.0000000000001205_Figure_e-6.pdf]

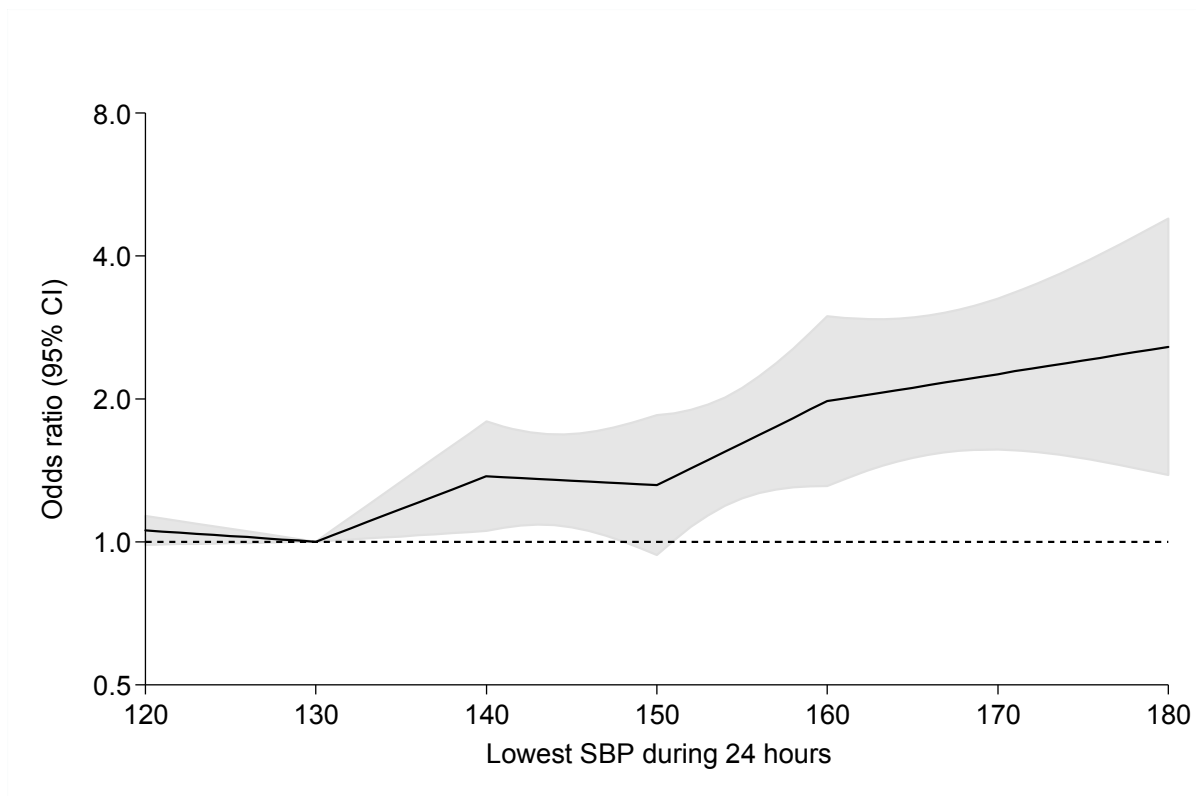

**Figure e-6. Effects of lowest systolic blood pressure during the first 24 hours on score of the modified Rankin Scale at 90 days**

SBP indicates systolic blood pressure; 95% CI, 95% confidence interval. Odds ratios and 95% CIs (shaded areas) were shown according to the lowest systolic blood pressure after adjustment for age, sex, region, time from onset to randomization, National Institutes of Health Stroke Scale (NIHSS) score, volume and location of hematoma, intraventricular extension and randomized treatment. The reference was the lowest systolic blood pressure of 130 mmHg.
