# Supplementary material
Source: PubMed Central journal article supplement (PMC4336065)
Supplement: supp_WNL.0000000000001205_Table_e-1.pdf [file supp_WNL.0000000000001205_Table_e-1.pdf]

**Table e-1. Score of the modified Rankin Scale at 90 days in randomized groups by baseline systolic blood pressure**

|                                                                      | Intensive | Guideline |
|----------------------------------------------------------------------|-----------|-----------|
| <b>&lt;160 mmHg</b>                                                  |           |           |
| 0: No symptoms at all                                                | 24 (13%)  | 14 (8%)   |
| 1: No substantive disability despite symptoms                        | 40 (21%)  | 45 (26%)  |
| 2: Slight disability                                                 | 38 (20%)  | 28 (16%)  |
| 3: Moderate disability requiring some help                           | 29 (16%)  | 34 (20%)  |
| 4: Moderate-severe disability requiring assistance with daily living | 29 (16%)  | 23 (13%)  |
| 5: Severe disability, bed-bound and incontinent                      | 10 (5%)   | 11 (6%)   |
| 6: Death by 90 days                                                  | 17 (9%)   | 17 (10%)  |
| <b>160-169 mmHg</b>                                                  |           |           |
| 0: No symptoms at all                                                | 29 (10%)  | 19 (7%)   |
| 1: No substantive disability despite symptoms                        | 62 (21%)  | 55 (21%)  |
| 2: Slight disability                                                 | 56 (19%)  | 50 (19%)  |
| 3: Moderate disability requiring some help                           | 47 (16%)  | 43 (16%)  |
| 4: Moderate-severe disability requiring assistance with daily living | 51 (17%)  | 53 (20%)  |
| 5: Severe disability, bed-bound and incontinent                      | 14 (5%)   | 18 (7%)   |
| 6: Death by 90 days                                                  | 36 (12%)  | 25 (10%)  |
| <b>170-179 mmHg</b>                                                  |           |           |
| 0: No symptoms at all                                                | 16 (6%)   | 22 (7%)   |
| 1: No substantive disability despite symptoms                        | 51 (19%)  | 61 (20%)  |
| 2: Slight disability                                                 | 56 (21%)  | 50 (16%)  |
| 3: Moderate disability requiring some help                           | 42 (16%)  | 54 (17%)  |
| 4: Moderate-severe disability requiring assistance with daily living | 47 (18%)  | 55 (18%)  |
| 5: Severe disability, bed-bound and incontinent                      | 17 (6%)   | 31 (10%)  |
| 6: Death by 90 days                                                  | 33 (13%)  | 36 (12%)  |
| <b>180-189 mmHg</b>                                                  |           |           |
| 0: No symptoms at all                                                | 12 (5%)   | 23 (9%)   |
| 1: No substantive disability despite symptoms                        | 56 (22%)  | 39 (15%)  |
| 2: Slight disability                                                 | 44 (17%)  | 44 (17%)  |
| 3: Moderate disability requiring some help                           | 46 (18%)  | 41 (16%)  |
| 4: Moderate-severe disability requiring assistance with daily living | 47 (19%)  | 57 (22%)  |
| 5: Severe disability, bed-bound and incontinent                      | 18 (7%)   | 21 (8%)   |
| 6: Death by 90 days                                                  | 29 (12%)  | 34 (13%)  |
| <b>≥190 mmHg</b>                                                     |           |           |
| 0: No symptoms at all                                                | 31 (8%)   | 29 (7%)   |
| 1: No substantive disability despite symptoms                        | 83 (22%)  | 54 (13%)  |
| 2: Slight disability                                                 | 65 (17%)  | 94 (23%)  |
| 3: Moderate disability requiring some help                           | 56 (15%)  | 62 (15%)  |
| 4: Moderate-severe disability requiring assistance with daily living | 76 (20%)  | 80 (20%)  |
| 5: Severe disability, bed-bound and incontinent                      | 24 (6%)   | 32 (8%)   |
| 6: Death by 90 days                                                  | 51 (13%)  | 58 (14%)  |
| <b>OVERALL</b>                                                       |           |           |
| 0: No symptoms at all                                                | 112 (8%)  | 107 (8%)  |

|                                                                      |           |           |
|----------------------------------------------------------------------|-----------|-----------|
| 1: No substantive disability despite symptoms                        | 292 (21%) | 254 (18%) |
| 2: Slight disability                                                 | 259 (19%) | 266 (19%) |
| 3: Moderate disability requiring some help                           | 220 (16%) | 234 (17%) |
| 4: Moderate-severe disability requiring assistance with daily living | 250 (18%) | 268 (19%) |
| 5: Severe disability, bed-bound and incontinent                      | 83 (6%)   | 113 (8%)  |
| 6: Death by 90 days                                                  | 166 (12%) | 170 (12%) |

---
